# Supplementary material
Source: ML conference proceedings conference paper supplement (https://proceedings.mlr.press/v84/diao18a.html)
Supplement: Supplementary file [file diao18a-supp.pdf]

## A Background: COUNTSKETCH and TENSORSKETCH

We start by describing the COUNTSKETCH transform Charikar et al. (2004). Let  $m$  be the target dimension. When applied to  $n$ -dimensional vectors, the transform is specified by a 2-wise independent hash function  $h : [n] \rightarrow [m]$  and a 2-wise independent sign function  $s : [n] \rightarrow \{-1, +1\}$ . When applied to  $v$ , the value at coordinate  $i$  of the output,  $i = 1, 2, \dots, m$  is  $\sum_{j|h(j)=i} s(j)v_j$ . Note that COUNTSKETCH can be represented as an  $m \times n$  matrix in which the  $j$ -th column contains a single non-zero entry  $s(j)$  in the  $h(j)$ -th row.

We now describe the TENSORSKETCH transform Pagh (2013). Suppose we are given points  $v_i \in \mathbb{R}^{n_i}$ , where  $i = 1, \dots, q$  and so  $\phi(v_1, \dots, v_q) = v_1 \otimes v_2 \otimes \dots \otimes v_q \in \mathbb{R}^{n_1 n_2 \dots n_q}$ , and the target dimension is again  $m$ . The transform is specified using  $q$  3-wise independent hash functions  $h_i : [n_i] \rightarrow [m]$ , and  $q$  4-wise independent sign functions  $s_i : [n_i] \rightarrow \{+1, -1\}$ , where  $i = 1, \dots, q$ . TENSORSKETCH applied to  $v_1, \dots, v_q$  is then COUNTSKETCH applied to  $\phi(v_1, \dots, v_q)$  with hash function  $H : [n_1 n_2 \dots n_q] \rightarrow [m]$  and sign function  $S : [n_1 n_2 \dots n_q] \rightarrow \{+1, -1\}$  defined as follows:

$$H(i_1, \dots, i_q) = h_1(i_1) + h_2(i_2) + \dots + h_q(i_q) \text{ mod } m,$$

and

$$S(i_1, \dots, i_q) = s_1(i_1) \cdot s_2(i_2) \cdot \dots \cdot s_q(i_q),$$

where  $i_j \in [n_j]$ . It is well-known that if  $H$  is constructed this way, then it is 3-wise independent Carter and Wegman (1979); Patrascu and Thorup (2012). Unlike the work of Pham and Pagh Pham and Pagh (2013), which only used that  $H$  was 2-wise independent, our analysis needs this stronger property of  $H$ .

The TENSORSKETCH transform can be applied to  $v_1, \dots, v_q$  without computing  $\phi(v_1, \dots, v_q)$  as follows. Let  $v_j = (v_{j\ell}) \in \mathbb{R}^{n_j}$ . First, compute the polynomials

$$p_\ell(x) = \sum_{i=0}^{B-1} x^i \sum_{j_\ell|h_\ell(j_\ell)=i} v_{j_\ell} \cdot s_\ell(j_\ell),$$

for  $\ell = 1, 2, \dots, q$ . A calculation Pagh (2013) shows

$$\prod_{\ell=1}^q p_\ell(x) \text{ mod } (x^B - 1) = \sum_{i=0}^{B-1} x^i \sum_{(j_1, \dots, j_q)|H(j_1, \dots, j_q)=i} v_{j_1} \cdot \dots \cdot v_{j_q} S(j_1, \dots, j_q),$$

that is, the coefficients of the product of the  $q$  polynomials mod  $(x^B - 1)$  form the value of TENSORSKETCH( $v_1, \dots, v_q$ ). Pagh observed that this product of polynomials can be computed in  $O(qm \log m)$  time using the Fast Fourier Transform. As it takes  $O(q \max(\mathbf{nnz}(v_i)))$  time to form the  $q$  polynomials, the overall time to compute TENSORSKETCH( $v$ ) is  $O(q(\max(\mathbf{nnz}(v_i)) + m \log m))$ .

## B TENSORSKETCH is an Oblivious Subspace Embedding (OSE)

Let  $S$  be the  $m \times (n_1 n_2 \dots n_q)$  matrix such that TENSORSKETCH( $v_1, \dots, v_q$ ) is  $S \cdot \phi(v_1, \dots, v_q)$  for a randomly selected TENSORSKETCH. Notice that  $S$  is a random matrix. In the rest of the paper, we refer to such a matrix as a TENSORSKETCH matrix with an appropriate number of rows, i.e., the number of hash buckets. We will show that  $S$  is an oblivious subspace embedding for subspaces in  $\mathbb{R}^{n_1 n_2 \dots n_q}$  for appropriate values of  $m$ . Notice that  $S$  has exactly one non-zero entry per column. The index of the non-zero in the column  $(i_1, \dots, i_q)$  is  $H(i_1, \dots, i_q) = \sum_{j=1}^q h_j(i_j) \text{ mod } m$ . Let  $\delta_{a,b}$  be the indicator random variable of whether  $S_{a,b}$  is non-zero. The sign of the non-zero entry in column  $(i_1, \dots, i_q)$  is  $S(i_1, \dots, i_q) = \prod_{j=1}^q s_j(i_j)$ . We show that the embedding matrix  $S$  of TENSORSKETCH can be used to approximate matrix product and is an oblivious subspace embedding (OSE).

**Theorem B.1.** *Let  $S$  be the  $m \times (n_1 n_2 \dots n_q)$  matrix such that*

$$\text{TENSORSKETCH}(v_1, \dots, v_q)$$

*is  $S \cdot \phi(v_1, \dots, v_q)$  for a randomly selected TENSORSKETCH. The matrix  $S$  satisfies the following two properties.*

1. (Approximate Matrix Product :) Let  $A$  and  $B$  be matrices with  $n_1 n_2 \cdots n_q$  rows. For  $m \geq (2 + 3^q)/(\epsilon^2 \delta)$ , we have

$$\Pr_S [\|A^\top S^\top S B - A^\top B\|_F^2 \leq \epsilon^2 \|A\|_F^2 \|B\|_F^2] \geq 1 - \delta.$$

2. (Subspace Embedding :) Consider a fixed  $k$ -dimensional subspace  $V$ . If  $m \geq k^2(2 + 3^q)/(\epsilon^2 \delta)$ , then with probability at least  $1 - \delta$ ,  $\|Sx\| = (1 \pm \epsilon)\|x\|$  simultaneously for all  $x \in V$ .

We establish the theorem via two lemmas as in Avron et al. (2016). The first lemma proves the approximate matrix product property via a careful second moment analysis.

**Lemma B.2** (Approximate matrix product). Let  $A$  and  $B$  be matrices with  $n_1 n_2 \cdots n_q$  rows. For  $m \geq (2 + 3^q)/(\epsilon^2 \delta)$ , we have

$$\Pr_S [\|A^\top S^\top S B - A^\top B\|_F^2 \leq \epsilon^2 \|A\|_F^2 \|B\|_F^2] \geq 1 - \delta.$$

*Proof.* The proof follows that in Avron et al. (2016). Let  $C = A^\top S^\top S B$ . We have

$$C_{u,u'} = \sum_{t=1}^m \sum_{i,j \in [n_1 n_2 \cdots n_q]} S(i)S(j) \delta_{t,i} \delta_{t,j} A_{i,u} B_{j,u'} = \sum_{t=1}^m \sum_{i \neq j \in [n_1 n_2 \cdots n_q]} S(i)S(j) \delta_{t,i} \delta_{t,i} A_{i,u} B_{j,u'} + (A^\top B)_{u,u'}$$

Thus,  $\mathbf{E}[C_{u,u'}] = (A^\top B)_{u,u'}$ .

Next, we analyze  $\mathbf{E}[(C - A^\top B)_{u,u'}^2]$ . We have

$$((C - A^\top B)_{u,u'})^2 = \sum_{t_1, t_2=1}^m \sum_{i_1 \neq j_1, i_2 \neq j_2 \in [n_1 n_2 \cdots n_q]} S(i_1)S(i_2)S(j_1)S(j_2) \cdot \delta_{t_1, i_1} \delta_{t_1, j_1} \delta_{t_2, i_2} \delta_{t_2, j_2} \cdot A_{i_1, u} A_{i_2, u} B_{j_1, u'} B_{j_2, u'}$$

For a term in the summation on the right hand side to have a non-zero expectation, it must be the case that  $\mathbf{E}[S(i_1)S(i_2)S(j_1)S(j_2)] \neq 0$ . Note that  $S(i_1)S(i_2)S(j_1)S(j_2)$  is a product of random signs (possibly with multiplicities) where the random signs in different coordinates in  $\{1, \dots, q\}$  are independent and they are 4-wise independent within each coordinate. Thus,  $\mathbf{E}[S(i_1)S(i_2)S(j_1)S(j_2)]$  is either 1 or 0. For the expectation to be 1, all random signs must appear with even multiplicities. In other words, in each of the  $q$  coordinates, the 4 coordinates of  $i_1, i_2, j_1, j_2$  must be the same number appearing 4 times or 2 distinct numbers, each appearing twice. All the subsequent claims in the proof regarding  $i_1, i_2, j_1, j_2$  agreeing on some coordinates follow from this property.

Let  $S_1$  be the set of coordinates where  $i_1$  and  $i_2$  agree. Note that  $j_1$  and  $j_2$  must also agree in all coordinates in  $S_1$  by the above argument. Let  $S_2 \subset [q] \setminus S_1$  be the coordinates among the remaining where  $i_1$  and  $j_1$  agree. Finally, let  $S_3 = [q] \setminus (S_1 \cup S_2)$ . All coordinates in  $S_3$  of  $i_1$  and  $j_2$  must agree. Similarly as before, note that  $i_2$  and  $j_2$  agree on all coordinates in  $S_2$  and  $i_2$  and  $j_1$  agree on all coordinates in  $S_3$ . We can rewrite  $i_1 = (a, b, c), i_2 = (a, e, f), j_1 = (g, b, f), j_2 = (g, e, c)$  where  $a = (a_\ell), g = (g_\ell)$  with  $\ell \in S_1, b = (b_\ell), e = (e_\ell)$  with  $\ell \in S_2$  and  $c = (c_\ell), f = (f_\ell)$  with  $\ell \in S_3$ .

First we show that the contribution of the terms where  $i_1 = i_2$  or  $i_1 = j_2$  is bounded by  $\frac{2\|A_u\|_2^2 \|B_{u'}\|_2^2}{m}$ , where  $A_u$  is the  $u$ th column of  $A$  and  $B_{u'}$  is the  $u'$ th column of  $B$ . Indeed, consider the case  $i_1 = i_2$ . As observed before, we must have  $j_1 = j_2$  to get a non-zero contribution. Note that if  $t_1 \neq t_2$ , we always have  $\delta_{t_1, i_1} \delta_{t_2, i_2} = 0$  as  $H(i_1)$  cannot be equal to both  $t_1$  and  $t_2$ . Thus, for fixed  $i_1 = i_2, j_1 = j_2$ ,

$$\begin{aligned} & \mathbf{E} \left[ \sum_{t_1, t_2=1}^m S(i_1)S(i_2)S(j_1)S(j_2) \cdot \delta_{t_1, i_1} \delta_{t_1, j_1} \delta_{t_2, i_2} \delta_{t_2, j_2} \cdot A_{i_1, u} A_{i_2, u} B_{j_1, u'} B_{j_2, u'} \right] \\ &= \mathbf{E} \left[ \sum_{t_1=1}^m \delta_{i_1, t_1}^2 \delta_{j_1, t_1}^2 A_{i_1, u}^2 B_{j_1, u'}^2 \right] \\ &= \frac{A_{i_1, u}^2 B_{j_1, u'}^2}{m} \end{aligned}$$

Summing over all possible values of  $i_1, j_1$ , we get the desired bound of  $\frac{\|A_u\|_2^2 \|B_{u'}\|_2^2}{m}$ . The case  $i_1 = j_2$  is analogous.

Next we compute the contribution of the terms where  $i_1 \neq i_2, j_1, j_2$  i.e., there are at least 3 distinct numbers among  $i_1, i_2, j_1, j_2$ . Notice that  $\mathbf{E}[\delta_{t_1, i_1} \delta_{t_1, j_1} \delta_{t_2, i_2} \delta_{t_2, j_2}] \leq \frac{1}{m^3}$  because the  $\delta_{t, i}$ 's are 3-wise independent. For fixed  $i_1, j_1, i_2, j_2$ , there are  $m^2$  choices of  $t_1, t_2$  so the total contribution to the expectation from terms with the same  $i_1, j_1, i_2, j_2$  is bounded by  $m^2 \cdot \frac{1}{m^3} \cdot |A_{i_1, u} A_{i_2, u} B_{j_1, u'} B_{j_2, u'}| = \frac{1}{m} |A_{i_1, u} A_{i_2, u} B_{j_1, u'} B_{j_2, u'}|$ .

Therefore,

$$\begin{aligned}
 & \mathbf{E}[\|(C - A^\top B)_{u, u'}\|^2] \\
 & \leq \frac{2\|A_u\|_2^2 \|B_{u'}\|_2^2}{m} + \frac{1}{m} \sum_{\text{partition } S_1, S_2, S_3} \sum_{a, g, b, e, c, f} |A_{(a, b, c), u} B_{(g, b, f), u'} A_{(a, e, f), u} B_{(g, e, c), u'}| \\
 & \leq \frac{2\|A_u\|_2^2 \|B_{u'}\|_2^2}{m} + \frac{3^q}{m} \sum_{a, b, c, g, e, f} |A_{(a, b, c), u} B_{(g, b, f), u'} A_{(a, e, f), u} B_{(g, e, c), u'}| \\
 & \leq \frac{2\|A_u\|_2^2 \|B_{u'}\|_2^2}{m} + \frac{3^q}{m} \sum_{g, e, f} \left( \sum_{a, b, c} A_{(a, b, c), u}^2 \right)^{1/2} \left( \sum_{a, b, c} B_{(g, b, f), u'}^2 A_{(a, e, f), u}^2 B_{(g, e, c), u'}^2 \right)^{1/2} \\
 & = \frac{2\|A_u\|_2^2 \|B_{u'}\|_2^2}{m} + \frac{3^q \|A_u\|}{m} \sum_{g, e, f} \left( \sum_b B_{(g, b, f), u'}^2 \right)^{1/2} \left( \sum_{a, c} A_{(a, e, f), u}^2 B_{(g, e, c), u'}^2 \right)^{1/2} \\
 & \leq \frac{2\|A_u\|_2^2 \|B_{u'}\|_2^2}{m} + \frac{3^q \|A_u\|}{m} \sum_e \left( \sum_{b, g, f} B_{(g, b, f), u'}^2 \right)^{1/2} \left( \sum_{a, c, g, f} A_{(a, e, f), u}^2 B_{(g, e, c), u'}^2 \right)^{1/2} \\
 & = \frac{2\|A_u\|_2^2 \|B_{u'}\|_2^2}{m} + \frac{3^q \|A_u\| \cdot \|B_{u'}\|}{m} \sum_e \left( \sum_{a, f} A_{(a, e, f), u}^2 \right)^{1/2} \left( \sum_{g, c} B_{(g, e, c), u'}^2 \right)^{1/2} \\
 & \leq \frac{2\|A_u\|_2^2 \|B_{u'}\|_2^2}{m} + \frac{3^q \|A_u\| \cdot \|B_{u'}\|}{m} \left( \sum_{a, e, f} A_{(a, e, f), u}^2 \right)^{1/2} \left( \sum_{g, e, c} B_{(g, e, c), u'}^2 \right)^{1/2} \\
 & = \frac{(2 + 3^q) \|A_u\|_2^2 \|B_{u'}\|_2^2}{m},
 \end{aligned}$$

where the second inequality follows from the fact that there are at most  $3^q$  partitions of  $[q]$  into 3 sets. The other inequalities are from Cauchy-Schwarz.

Combining the above bounds, we have  $\mathbf{E}[\|(C - A^\top B)_{u, u'}\|^2] \leq \frac{(2+3^q)\|A_u\|_2^2 \|B_{u'}\|_2^2}{m}$ . For  $m \geq (2 + 3^q)/(\epsilon^2 \delta)$ , by the Markov inequality,  $\|A^\top S^\top SB - A^\top B\|_F^2 \leq \epsilon^2 \|A\|_F^2 \|B\|_F^2$  with probability  $1 - \delta$ .  $\square$   $\square$

The second lemma proves that the subspace embedding property follows from the approximate matrix product property.

**Lemma B.3** (Oblivious subspace embeddings). *Consider a fixed  $k$ -dimensional subspace  $V \subset \mathbb{R}^{n_1 n_2 \cdots n_q}$ . If  $m \geq k^2(2 + 3^q)/(\epsilon^2 \delta)$ , then with probability at least  $1 - \delta$ ,  $\|Sx\|_2 = (1 \pm \epsilon)\|x\|_2$  simultaneously for all  $x \in V$ .*

*Proof.* Let  $B$  be a  $(n_1 n_2 \cdots n_q) \times k$  matrix whose columns form an orthonormal basis of  $V$ . Thus, we have  $B^\top B = I_k$  and  $\|B\|_F^2 = k$ . The condition that  $\|Sx\|_2 = (1 \pm \epsilon)\|x\|_2$  simultaneously for all  $x \in V$  is equivalent to the condition that the singular values of  $SB$  are bounded by  $1 \pm \epsilon$ . By Lemma B.2, for  $m \geq (2 + 3^q)/((\epsilon/k)^2 \delta)$ , with probability at least  $1 - \delta$ , we have

$$\|B^\top S^\top SB - B^\top B\|_F^2 \leq (\epsilon/k)^2 \|B\|_F^4 = \epsilon^2$$

Thus, we have  $\|B^\top S^\top SB - I_k\|_2 \leq \|B^\top S^\top SB - I_k\|_F \leq \epsilon$ . In other words, the squared singular values of  $SB$  are bounded by  $1 \pm \epsilon$ , implying that the singular values of  $SB$  are also bounded by  $1 \pm \epsilon$ . Note that  $\|A\|_2$  for a matrix  $A$  denotes its operator norm.  $\square$   $\square$

## C Missing Proofs

### C.1 Proofs for Tensor Product Least Square Regression

**Theorem 3.1.** (Tensor regression) Suppose  $\tilde{x}$  is the output of Algorithm 1 with TENSORSKETCH  $S \in \mathbb{R}^{m \times n}$ , where  $m = 8(d_1 d_2 \cdots d_q + 1)^2(2 + 3^q)/(\epsilon^2 \delta)$ . Then the following approximation  $\|(A_1 \otimes A_2 \otimes \cdots \otimes A_q)\tilde{x} - b\|_2 \leq (1 + \epsilon) \text{OPT}$ , holds with probability at least  $1 - \delta$ .

*Proof.* It is easy to see that

$$\|(A_1 \otimes A_2 \otimes \cdots \otimes A_q)x - b\|_2 = \left\| \begin{bmatrix} (A_1 \otimes A_2 \otimes \cdots \otimes A_q) & b \end{bmatrix} \begin{bmatrix} x \\ -1 \end{bmatrix} \right\|_2,$$

and identifying

$$y = \begin{bmatrix} (A_1 \otimes A_2 \otimes \cdots \otimes A_q) & b \end{bmatrix} \begin{bmatrix} x \\ -1 \end{bmatrix} \in \mathbb{R}^{n_1 n_2 \cdots n_q}$$

and  $y$  is a vector of a subspace  $V \subset \mathbb{R}^{n_1 n_2 \cdots n_q}$  with dimension at most  $d_1 d_2 \cdots d_q + 1$ , we can use Lemma B.3 to conclude that

$$\Pr [\|Sy\|_2 - \|y\|_2 \leq \epsilon \|y\|_2] \geq 1 - \delta$$

when  $m = (d_1 d_2 \cdots d_q + 1)^2(2 + 3^q)/(\epsilon^2 \delta)$ .

Thus we have

$$\|(A_1 \otimes A_2 \otimes \cdots \otimes A_q)\tilde{x} - b\|_2 \leq \frac{1}{1 - \epsilon} \|S(A_1 \otimes A_2 \otimes \cdots \otimes A_q)\tilde{x} - Sb\|_2$$

and

$$\|S(A_1 \otimes A_2 \otimes \cdots \otimes A_q)x - Sb\|_2 \leq (1 + \epsilon) \|(A_1 \otimes A_2 \otimes \cdots \otimes A_q)x - b\|_2$$

hold with probability at least  $1 - \delta$ . Then using a union bound, we have

$$\begin{aligned} & \|(A_1 \otimes A_2 \otimes \cdots \otimes A_q)\tilde{x} - b\|_2 \\ & \leq \frac{1}{1 - \epsilon} \|S(A_1 \otimes A_2 \otimes \cdots \otimes A_q)\tilde{x} - Sb\|_2 \\ & \leq \frac{1}{1 - \epsilon} \|S(A_1 \otimes A_2 \otimes \cdots \otimes A_q)x - Sb\|_2 \\ & \leq \frac{1 + \epsilon}{1 - \epsilon} \|(A_1 \otimes A_2 \otimes \cdots \otimes A_q)x - b\|_2 \end{aligned}$$

holds with probability at least  $1 - 2\delta$ . □

**Corollary 3.2.** (Sketch for tensor nonnegative regression) Suppose  $\tilde{x} = \min_{x \geq 0} \|SAx - Sb\|_2$  with TENSORSKETCH  $S \in \mathbb{R}^{m \times n}$ , where  $m = 8(d_1 d_2 \cdots d_q + 1)^2(2 + 3^q)/(\epsilon^2 \delta)$ . Then the following approximation  $\|(A_1 \otimes A_2 \otimes \cdots \otimes A_q)\tilde{x} - b\|_2 \leq (1 + \epsilon) \text{OPT}$  holds with probability at least  $1 - \delta$ , where  $\text{OPT} = \min_{x \geq 0} \|(A_1 \otimes A_2 \otimes \cdots \otimes A_q)x - b\|_2$ .

*Proof.* The proof of Theorem. 3.2 is similar to the proof of theorem 3.1. Denote  $\tilde{x} = \min_{x \geq 0} \|SAx - Sb\|_2$  and  $x^* = \min_{x \geq 0} \|Ax - b\|_2$ . Using Lemma. B.3, we have:

$$\|A\tilde{x} - b\|_2 \leq \frac{1}{1 - \epsilon} \|SA\tilde{x} - Sb\|_2, \tag{6}$$

with probability at least  $1 - \delta$ , and

$$\|SAx^* - Sb\|_2 \leq (1 + \epsilon) \|Ax^* - b\|_2, \tag{7}$$

with probability at least  $1 - \delta$ . Hence applying a union bound we have:

$$\begin{aligned} & \|\mathcal{A}\tilde{x} - b\|_2 \\ & \leq \frac{1}{1 - \epsilon} \|S\mathcal{A}\tilde{x} - Sb\|_2 \end{aligned} \tag{8}$$

$$\begin{aligned} & \leq \frac{1}{1 - \epsilon} \|S\mathcal{A}x^* - Sb\|_2 \\ & \leq \frac{1 + \epsilon}{1 - \epsilon} \|\mathcal{A}x^* - b\|_2, \end{aligned} \tag{9}$$

with probability at least  $1 - 2\delta$ .  $\square$

## C.2 Proofs for P-Splines

**Lemma 4.1.** *Let  $x^* \in \mathbb{R}^d$ ,  $A \in \mathbb{R}^{n \times d}$  and  $b \in \mathbb{R}^n$  as above. Let  $U_1 \in \mathbb{R}^{n \times d}$  denote the first  $n$  rows of an orthogonal basis for  $\begin{bmatrix} A \\ \sqrt{\lambda}L \end{bmatrix} \in \mathbb{R}^{(n+p) \times d}$ . Let sketching matrix  $S \in \mathbb{R}^{m \times n}$  have a distribution such that with constant probability*

$$(I) \|U_1^\top S^\top S U_1 - U_1^\top U_1\|_2 \leq 1/4,$$

and

$$(II) \|U_1^\top (S^\top S - I)(b - Ax^*)\|_2 \leq \sqrt{\epsilon \text{OPT}}/2.$$

Let  $\tilde{x}$  denote  $\text{argmin}_{x \in \mathbb{R}^d} \|S(Ax - b)\|_2^2 + \lambda \|Lx\|_2^2$ . Then with probability at least  $9/10$ ,

$$\|\mathcal{A}\tilde{x} - b\|_2^2 + \lambda \|L\tilde{x}\|_2^2 \leq (1 + \epsilon) \text{OPT}.$$

*Proof.* Let  $\hat{A} \in \mathbb{R}^{(n+d) \times d}$  have orthonormal columns with  $\text{range}(\hat{A}) = \text{range}\left(\begin{bmatrix} A \\ \sqrt{\lambda}L \end{bmatrix}\right)$ . (An explicit expression for one such  $\hat{A}$  is given below.) Let  $\hat{b} \equiv \begin{bmatrix} b \\ 0_d \end{bmatrix}$ . We have

$$\min_{y \in \mathbb{R}^d} \|\hat{A}y - \hat{b}\|_2 \tag{10}$$

equivalent to  $\|b - Ax\|_2^2 + \lambda \|Lx\|_2^2$ , in the sense that for any  $\hat{A}y \in \text{range}(\hat{A})$ , there is  $x \in \mathbb{R}^d$  with  $\hat{A}y = \begin{bmatrix} A \\ \sqrt{\lambda}L \end{bmatrix} x$ , so that  $\|\hat{A}y - \hat{b}\|_2^2 = \left\| \begin{bmatrix} A \\ \sqrt{\lambda}L \end{bmatrix} x - \hat{b} \right\|_2^2 = \|b - Ax\|_2^2 + \lambda \|Lx\|_2^2$ . Let  $y^* = \text{argmin}_{y \in \mathbb{R}^d} \|\hat{A}y - \hat{b}\|_2$ , so that  $\hat{A}y^* = \begin{bmatrix} Ax^* \\ \sqrt{\lambda}Lx^* \end{bmatrix}$ .

Let  $\hat{A} = \begin{bmatrix} U_1 \\ U_2 \end{bmatrix}$ , where  $U_1 \in \mathbb{R}^{n \times d}$  and  $U_2 \in \mathbb{R}^{d \times d}$ , so that  $U_1$  is as in the lemma statement.

We define  $\hat{S}$  to be  $\begin{bmatrix} S & 0_{m \times d} \\ 0_{d \times n} & I_d \end{bmatrix}$  and  $\hat{S}$  satisfies Property (I) and (II) of Lemma 4.1.

Using  $\|U_1^\top S^\top S U_1 - U_1^\top U_1\|_2 \leq 1/4$ , with constant probability

$$\|\hat{A}^\top \hat{S}^\top \hat{S} \hat{A} - I_d\|_2 = \|U_1^\top S^\top S U_1 + U_2^\top U_2 - I_d\|_2 = \|U_1^\top S^\top S U_1 - U_1^\top U_1\|_2 \leq 1/4. \tag{11}$$

Using the normal equations for Eq. (10), we have

$$0 = \hat{A}^\top (\hat{b} - \hat{A}y^*) = U_1^\top (b - Ax^*) - \sqrt{\lambda} U_2^\top x^*,$$

and so

$$\hat{A}^\top \hat{S}^\top \hat{S} (\hat{b} - \hat{A}y^*) = U_1^\top S^\top S (b - Ax^*) - \sqrt{\lambda} U_2^\top x^* = U_1^\top S^\top S (b - Ax^*) - U_1^\top (b - Ax^*).$$

Using Property (II) of Lemma 4.1, with constant probability

$$\begin{aligned} & \|\hat{A}^\top \hat{S}^\top \hat{S} (\hat{b} - \hat{A}y^*)\|_2 \\ & = \|U_1^\top S^\top S (b - Ax^*) - U_1^\top (b - Ax^*)\|_2 \\ & \leq \sqrt{\epsilon \text{OPT}}/2 \\ & = \sqrt{\epsilon/2} \|\hat{b} - \hat{A}y^*\|_2. \end{aligned} \tag{12}$$

It follows by a standard result from (11) and (12) that the solution  $\tilde{y} \equiv \operatorname{argmin}_{y \in \mathbb{R}^d} \|\hat{S}(\hat{A}y - \hat{b})\|_2$  has  $\|\hat{A}\tilde{y} - \hat{b}\|_2 \leq (1 + \epsilon) \min_{y \in \mathbb{R}^d} \|\hat{A}y - \hat{b}\|_2$ , and therefore that  $\tilde{x}$  satisfies the claim of the theorem.

For convenience we give the proof of the standard result: (11) implies that  $\hat{A}^\top \hat{S}^\top \hat{S} \hat{A}$  has smallest singular value at least  $3/4$ . The normal equations for the unsketched and sketched problems are

$$\hat{A}^\top (\hat{b} - \hat{A}y^*) = 0 = \hat{A}^\top \hat{S}^\top \hat{S} (\hat{b} - \hat{A}\tilde{y}).$$

The normal equations for the unsketched case imply  $\|\hat{A}\tilde{y} - \hat{b}\|_2^2 = \|\hat{A}(\tilde{y} - y^*)\|_2^2 + \|\hat{b} - \hat{A}y^*\|_2^2$ , so it is enough to show that  $\|\hat{A}(\tilde{y} - y^*)\|_2^2 = \|\tilde{y} - y^*\|_2^2 \leq \epsilon \text{OPT}$ . We have

$$\begin{aligned} (3/4)\|\tilde{y} - y^*\|_2 &\leq \|\hat{A}^\top \hat{S}^\top \hat{S} \hat{A}(\tilde{y} - y^*)\|_2 && \text{by Eq. (11)} \\ &= \|\hat{A}^\top \hat{S}^\top \hat{S} \hat{A}(\tilde{y} - y^*) - \hat{A}^\top \hat{S}^\top \hat{S} (\hat{b} - \hat{A}\tilde{y})\|_2 && \text{by Normal Equation} \\ &= \|\hat{A}^\top \hat{S}^\top \hat{S} (\hat{b} - \hat{A}y^*)\|_2 \\ &\leq \sqrt{\epsilon \text{OPT}/2} && \text{by Eq. (12),} \end{aligned}$$

so that  $\|\tilde{y} - y^*\|_2^2 \leq (4/3)^2 \epsilon \text{OPT} / 2 \leq \epsilon \text{OPT}$ . The lemma follows.  $\square$

The following lemma computes the statistical dimension  $\text{sd}_\lambda(A, L)$  that will be used for computing the number of rows of sketching matrix  $S$ .

**Lemma C.1.** *For  $U_1$  as in Lemma 4.1,  $\|U_1\|_F^2 = \text{sd}_\lambda(A, L) = \sum_i 1/(1 + \lambda/\gamma_i^2) + d - p$ , where  $A$  has singular values  $\sigma_i$ . Also  $\|U_1\|_2 = \max\{1/\sqrt{1 + \lambda/\gamma_1^2}, 1\}$ .*

*Proof.* Suppose we have the GSVD of  $(A, L)$ . Let

$$D \equiv \begin{bmatrix} \Sigma^\top \Sigma + \lambda \Omega^\top \Omega & 0_{p \times (n-p)} \\ 0_{(n-p) \times p} & I_{d-p} \end{bmatrix}^{-1/2}.$$

Then

$$\hat{A} = \begin{bmatrix} U \begin{bmatrix} \Sigma & 0_{p \times (n-p)} \\ 0_{(n-p) \times p} & I_{d-p} \end{bmatrix} D \\ \sqrt{\lambda} V \begin{bmatrix} \Omega & 0_{p \times (n-p)} \end{bmatrix} D \end{bmatrix}$$

has  $\hat{A}^\top \hat{A} = I_d$ , and for given  $x$ , there is  $y = D^{-1} R Q^\top x$  with  $\hat{A}y = \begin{bmatrix} A \\ \sqrt{\lambda} L \end{bmatrix} x$ . We have  $\|U_1\|_F^2 = \left\| U \begin{bmatrix} \Sigma & 0_{p \times (n-p)} \\ 0_{(n-p) \times p} & I_{d-p} \end{bmatrix} D \right\|_F^2 = \left\| \begin{bmatrix} \Sigma & 0_{p \times (n-p)} \\ 0_{(n-p) \times p} & I_{d-p} \end{bmatrix} D \right\|_F^2 = \sum_{i=1}^p 1/(1 + \lambda/\gamma_i^2) + d - p$  as claimed.  $\square$

**Theorem 4.3.** (P-Spline regression) There is a constant  $K > 0$  such that for  $m \geq K(\epsilon^{-1} \text{sd}_\lambda(A, L) + \text{sd}_\lambda(A, L)^2)$  and  $S \in \mathbb{R}^{m \times n}$  a sparse embedding matrix (e.g., COUNTSKETCH) with  $SA$  computable in  $O(\text{nnz}(A))$  time, Property (I) and (II) of Lemma 4.1 apply, and with constant probability the corresponding  $\tilde{x} = \operatorname{argmin}_{x \in \mathbb{R}^d} \|S(Ax - b)\|_2 + \lambda \|Lx\|_2^2$  is an  $\epsilon$ -approximate solution to  $\min_{x \in \mathbb{R}^d} \|b - Ax\|_2^2 + \lambda \|Lx\|_2^2$ .

*Proof.* Recall that  $\text{sd}_\lambda(A, L) = \|U_1\|_F^2$ . Sparse embedding distributions satisfy the bound for approximate matrix multiplication

$$\|W^\top S^\top S H - W^\top H\|_F \leq C \|W\|_F \|H\|_F / \sqrt{m},$$

for a constant  $C$  (Clarkson and Woodruff, 2013; Meng and Mahoney, 2013; Nelson and Nguyen, 2013); this is also true of OSE matrices. We set  $W = H = U_1$  and use  $\|X\|_2 \leq \|X\|_F$  for all  $X$  and  $m \geq K \|U_1\|_F^4$  to obtain Property (I) of Lemma 4.1, and set  $W = U_1$ ,  $H = b - Ax^*$  and use  $m \geq K \|U_1\|_F^2 / \epsilon$  to obtain Property (II) of Lemma 4.1. (Here the bound is slightly stronger than Property (II), holding for  $\lambda = 0$ .) With Property (I) and Property (II), the claim for  $\tilde{x}$  from a sparse embedding follows using Lemma 4.1.  $\square$

### C.3 Proofs for Tensor Product $\ell_1$ Regression

**Lemma 5.3.** *For any  $p \geq 1$ . Condition(A) computes  $\mathcal{AU}/(d\gamma_p)$  which is an  $(\alpha, \beta\sqrt{3}d(tw)^{|1/p-1/2|}, p)$ -well-conditioned basis of  $\mathcal{A}$ , with probability at least  $1 - \prod_{i=1}^q (n_i/w_i)\delta$ .*

*Proof.* This lemma is similar to arguments in Clarkson et al. (2013), we simply adjust notation and parameters for completeness. Applying Theorem 5.2, we have that with probability at least  $1 - \prod_{i=1}^q (n_i/w_i)\delta$ , for all  $x \in \mathbb{R}^r$ , if we consider  $y = \mathcal{A}x$  and write  $y^\top = [z_1^\top, z_2^\top, \dots, z_{\prod_{i=1}^q n_i/w_i}^\top]^\top$ , then for all  $i \in [\prod_{i=1}^q n_i/w_i]$ ,

$$\sqrt{\frac{1}{2}}\|z_i\|_2 \leq \|S_i z_i\|_2 \leq \sqrt{\frac{3}{2}}\|z_i\|_2,$$

where  $S_i \in \mathbb{R}^{m_i \times \prod_{i=1}^q w_i}$ . In the following, suppose  $m_i = t$ . By relating the 2-norm and the  $p$ -norm, for  $1 \leq p \leq 2$ , we have

$$\|S_i z_i\|_p \leq t^{1/p-1/2}\|S_i z_i\|_2 \leq t^{1/p-1/2}\sqrt{\frac{3}{2}}\|z_i\|_2 \leq t^{1/p-1/2}\sqrt{\frac{3}{2}}\|z_i\|_p,$$

and similarly,

$$\|S_i z_i\|_p \geq \|S_i z_i\|_2 \geq \sqrt{\frac{1}{2}}\|z_i\|_2 \geq \sqrt{\frac{1}{2}}w^{1/2-1/p}\|z_i\|_p, \quad w = \prod_{j=1}^q w_j.$$

If  $p > 2$ , then

$$\|S_i z_i\|_p \leq \|S_i z_i\|_2 \leq \sqrt{\frac{3}{2}}\|z_i\|_2 \leq \sqrt{\frac{3}{2}}w^{1/2-1/p}\|z_i\|_p,$$

and similarly,

$$\|S_i z_i\|_p \geq t^{1/p-1/2}\|S_i z_i\|_2 \geq t^{1/p-1/2}\sqrt{\frac{1}{2}}\|z_i\|_2 \geq t^{1/p-1/2}\sqrt{\frac{1}{2}}\|z_i\|_p.$$

Since  $\|\mathcal{A}x\|_p^p = \|y\|_p^p = \sum_i \|z_i\|_p^p$  and  $\|S\mathcal{A}x\|_p^p = \sum_i \|S_i z_i\|_p^p$ , for  $p \in [1, 2]$  we have with probability  $1 - \prod_{i=1}^q (n_i/w_i)\delta$

$$\sqrt{\frac{1}{2}}w^{1/2-1/p}\|\mathcal{A}x\|_p \leq \|S\mathcal{A}x\|_p \leq \sqrt{\frac{3}{2}}t^{1/p-1/2}\|\mathcal{A}x\|_p,$$

and for  $p \in [2, \infty)$  with probability  $1 - \prod_{i=1}^q (n_i/w_i)\delta$

$$\sqrt{\frac{1}{2}}t^{1/p-1/2}\|\mathcal{A}x\|_p \leq \|S\mathcal{A}x\|_p \leq \sqrt{\frac{3}{2}}w^{1/2-1/p}\|\mathcal{A}x\|_p.$$

In either case,

$$\|\mathcal{A}x\|_p \leq \gamma_p \|S\mathcal{A}x\|_p \leq \sqrt{3}(tw)^{|1/p-1/2|}\|\mathcal{A}x\|_p. \quad (13)$$

We have, from the definition of an  $(\alpha, \beta, p)$ -well-conditioned basis, that

$$\|S\mathcal{A}U\|_p \leq \alpha \quad (14)$$

and for all  $x \in \mathbb{R}^d$ ,

$$\|x\|_q \leq \beta \|S\mathcal{A}Ux\|_p. \quad (15)$$

Combining (13) and (14), we have that with probability at least  $1 - \prod_{i=1}^q (n_i/w_i)\delta$ ,

$$\|\mathcal{AU}/(r\gamma_p)\|_p \leq \sum_i \|\mathcal{AU}_i/r\gamma_p\|_p \leq \sum_i \|S\mathcal{A}U_i/r\|_p \leq \alpha.$$

Combining (13) and (15), we have that with probability at least  $1 - \prod_{i=1}^q (n_i/w_i)\delta$ , for all  $x \in \mathbb{R}^r$ ,

$$\|x\|_q \leq \beta \|S\mathcal{A}Ux\|_p \leq \beta\sqrt{3}r(tw)^{|1/p-1/2|}\|\mathcal{AU}\frac{1}{r\gamma_p}x\|_p.$$

Hence  $\mathcal{AU}/(r\gamma_p)$  is an  $(\alpha, \beta\sqrt{3}r(tw)^{|1/p-1/2|}, p)$ -well-conditioned basis.  $\square$

**Theorem 5.4.** (Main result) Given  $\epsilon \in (0, 1)$ ,  $\mathcal{A} \in \mathbb{R}^{n \times d}$  and  $b \in \mathbb{R}^n$ , Alg. 3 computes  $\hat{x}$  such that with probability at least  $1/2$ ,  $\|\mathcal{A}\hat{x} - b\|_1 \leq (1 + \epsilon) \min_{x \in \mathbb{R}^d} \|\mathcal{A}x - b\|_1$ . For the special case when  $q = 2$ ,  $n_1 = n_2$ , the algorithm's running time is  $O(n_1^{3/2} \text{poly}(\prod_{i=1}^2 d_i/\epsilon))$ .

*Proof.* For notational simplicity, let us denote  $n_{[q_1]} = \prod_{i=1}^{q_1} n_i$ ,  $n_{[q] \setminus [q_1]} = \prod_{i=q_1+1}^q n_i$ ,  $d_{[q_1]} = \prod_{i=1}^{q_1} d_i$ , and  $d_{[q] \setminus [q_1]} = \prod_{i=q_1+1}^q d_i$ . For any row-block  $A_{i_1}^1 \otimes \dots \otimes A_{i_q}^{(q)}$ , computing  $S_{i_1 i_2 \dots i_q}(A_{i_1}^1 \otimes \dots \otimes A_{i_q}^{(q-1)})$  takes  $O(d(\sum_{k=1}^q \text{nnz}(A_{i_k}^{(k)})) + dqm \log(m))$  (see Sec 2). Hence for  $SA$ , it takes:

$$\left( d \sum_{k=1}^q \text{nnz}(A_k) \prod_{i \in [q] \setminus \{k\}} n_i/w_i \right) + \left( dqm \log(m) \prod_{i=1}^q n_i/w_i \right)$$

where  $S \in \mathbb{R}^{(m \prod_{i=1}^q (n_i/w_i)) \times \prod_{i=1}^q w_i}$  and  $m \geq 100 \prod_{i=1}^q d_i^2 (2 + 3^q)/\epsilon^2 = O(\text{poly}(d/\epsilon))$ . We need to compute an orthogonal factorization  $SA = QR_{\mathcal{A}}$  in  $O(qmd^2)$  and then compute  $U = R_{\mathcal{A}}^{-1}$  in  $O(d^3)$  time. Hence the total running time of Algorithm Condition( $\mathcal{A}$ ) is  $O(qmd^2 + d^3)$ . Thus the total running time of computing  $SA$  and Condition(A) is

$$O \left( \left( \sum_{k=1}^q \text{nnz}(A_k) \prod_{i \in [q] \setminus \{k\}} n_i/w_i \right) + \left( \prod_{i=1}^q n_i/w_i \right) \text{poly}(d/\epsilon) + qmd^2 + d^3 \right),$$

We will compute  $UG$  in  $O(d^2 \log n)$  time. We compute  $\tilde{E} = E(A_{q_1+1} \otimes \dots \otimes A_q)^T$  in  $O(dn_{[q] \setminus [q_1]})$  time.

Then we can compute  $R(A_1 \otimes \dots \otimes A_{q_1}) \tilde{E}_j$  in  $O(n_{[q_1]} d_{[q_1]} \log n + d_{[q_1]} n_{[q] \setminus [q_1]} \log n)$  time.

Since computation of the median  $\lambda_i$  takes  $O(\log n)$  time, computing all  $\lambda_i$  and then  $\lambda_e$  takes  $O(n_{[q] \setminus [q_1]} \log n)$  time.

As  $AUG$  has  $O(\log n)$  columns, we need to compute  $\lambda_e$  for each  $AUG$  using the above procedure and hence it takes in total  $O(d(n_{[q_1]} + n_{[q] \setminus [q_1]}) \log^2 n)$  time.

Sampling a column of  $AUG$  using  $\lambda_e$  takes  $O(\log n)$  time, sampling an entry in  $M$  takes in total  $O(n_{[q_1]} + n_{[q] \setminus [q_1]})$  time.

Since we need  $\sqrt{\prod_{k=1}^q w_k} \text{poly}(r)$  samples to select rows, the running time is  $d(n_{[q_1]} + n_{[q] \setminus [q_1]}) \log^2 n \cdot \sqrt{\prod_{k=1}^q w_k} \text{poly}(r)$ .

Now for simplicity, we set  $q = 2$ ,  $n_i = n_0$  for  $i \in [2]$ . Note that it is optimal to choose  $w_i = w$  for  $i \in [2]$ . Substituting  $q = 2, n_i = n_0$  and  $w_i = w$ , we that the total running time of Alg. 3:

$$O(dw^{-1}n_0(\text{nnz}(A_1) + \text{nnz}(A_2)) + w^{-2}n_0^2 \text{poly}(d/\epsilon) + wn_0 \text{poly}(d) \log(n)).$$

For dense  $A_1$  and  $A_2$ ,  $\text{nnz}(A_1) + \text{nnz}(A_2) = O(n_0)$  time, and so ignoring poly and log terms that do not depend on  $n_0$ , the total running time can be simplified to:

$$O(w^{-1}n_0^2 + wn_0).$$

Setting  $w = \sqrt{n_0}$ , we can minimize the above running time to  $O(n_0^{3/2})$ , which is faster than the  $n_0^2$  time for solving the problem by forming  $A_1 \otimes A_2$ .  $\square$
